# Supplementary material for: Attitudes and expectations of primary care physicians regarding recreational cannabis legalization in Germany: a pre-implementation survey
Source: Springer Nature journal article supplement (doi:10.1186/s42238-025-00367-8), 2025-12-02

## 5. Soziodemografische Daten

### 5.1 Welchem Geschlecht fühlen Sie sich zugehörig?

- männlich     weiblich     divers

### 5.2 Welcher Facharzttrichtung gehören Sie an? (Mehrfachnennung möglich)

- Allgemeinmedizin  
 Anästhesie

Freitext

### 5.2.1 Welche Zusatzweiterbildung haben Sie?

- Palliativmedizin     keine  
 Schmerzmedizin

Freitext

### 5.3 Wie alt sind Sie?

..... Zahlenwert

### 5.4 Seit wie vielen Jahren sind Sie im ambulanten Bereich tätig (inkl. Weiterbildungszeit)?

..... Zahlenwert

### 5.5 Wie viele Stunden pro Woche arbeiten Sie im ambulanten Bereich?

- Vollzeit     > 20 h     ≤ 20 h

### 5.6 Wie viele Scheine generieren Sie pro Quartal durchschnittlich in der Praxis persönlich?

- < 100     100 - 500     501 - 1000     > 1000

### 5.7 In welcher Praxisform arbeiten Sie?

- Einzelpraxis     Gemeinschaftspraxis     Praxisgemeinschaft     MVZ     andere

*Vielen Dank für Ihre Unterstützung und Mitarbeit!*

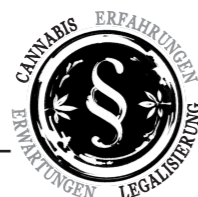

## Erfahrungen - Erwartungen der Cannabis Legalisierung

QR Code

Die Bundesregierung plant die Legalisierung von Cannabis. Wenig bekannt sind Erfahrungen niedergelassener Hausärzte und Anästhesisten und deren Meinungen zu erwartbaren Folgen der Cannabislegalisierung. Dieser Fragebogen soll dazu beitragen, diese Wissenslücken zu schließen.

Haben Sie Patienten, die mit Ihnen über Cannabis sprechen?     Ja     Nein

### 1. Erfahrungen mit Patienten, die Cannabis konsumieren (medizinischer Cannabis ausgenommen)

#### 1.1 Wie häufig fragen Sie Ihre Patienten nach dem Konsum von Drogen (außer Alkohol und Tabak)?

Gar nicht                            Sehr häufig

#### 1.1.1 Was ist der häufigste Anlass, an dem Sie Ihre Patienten nach Drogen fragen (außer Alkohol und Tabak)?

- in der Erstanamnese     in jedem Quartal     Ich frage nie.  
 beim Check up     nach Bauchgefühl    (weiter bei 1.2)  
 bei Verdacht/  
Anhaltspunkten    ..... Freitext

#### 1.1.2 Fragen Sie Ihre Patienten häufig explizit nach illegalem Cannabiskonsum?

Nein, gar nicht                         Ja, sehr häufig

#### 1.2 Wie viele Patienten betreuen Sie schätzungsweise pro Jahr, die illegal Cannabis konsumieren?

Weiß ich nicht     Keinen    ..... Zahlenwert  
(weiter bei 2.1)

#### 1.2.1 Sprechen Sie mit Ihren Patienten, die Cannabis anwenden, über deren Cannabiskonsum? (F1x.2= Substanzabhängigkeit, F1x.1= schädlicher Gebrauch)

Ja     Nein

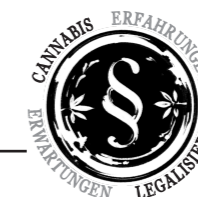

## 2. Erfahrungen mit der Verschreibung von medizinischem Cannabis

### 2.1 Verordnen Sie in Ihrer Praxis medizinisches Cannabis?

 Ja

 Nein (weiter bei 2.1.5)

#### 2.1.1 Welche Symptomatik wird am häufigsten in Ihrer Praxis mit medizinischem Cannabis behandelt? (Einfachauswahl)

- Schmerz  
 Spastik  
 Anorexie

Bitte nur eine Antwort!

Freitext

#### 2.1.2 Wie hat sich die zuvor angegebene Symptomatik im Durchschnitt unter Therapie mit medizinischem Cannabis verändert?

- Deutlich verschlechtert  
  
 Keine Veränderung  
  
 Deutlich verbessert

#### 2.1.3 Wie viele Ihrer Patienten erhalten schätzungsweise medizinisches Cannabis pro Quartal?

Zahlenwert

#### 2.1.4 Wie viele Ihrer Patienten, die medizinisches Cannabis erhalten, konsumieren zusätzlich illegal Cannabis?

- Keine  Weiß ich nicht.  
  
  
  
  
 Sehr viele

#### 2.1.5 Warum verordnen Sie kein medizinisches Cannabis? (Mehrfachauswahl möglich)

- Ich kenne mich nicht damit aus.  
 Ich bin noch nie darum gebeten worden.  
 Ich behandle keine Patienten mit entsprechenden Indikationen.  
 Ich halte nichts von Cannabistherapie.  
 Die Verordnung ist mir bürokratisch zu aufwändig.  
 Es ist zu zeitaufwändig, mich umfassend mit der Therapie auseinander zu setzen.  
 Ich habe Sorge, Suchtkrankheiten zu verstärken.

\_\_\_\_\_  
 \_\_\_\_\_  
 \_\_\_\_\_  
 \_\_\_\_\_  
 \_\_\_\_\_  
 \_\_\_\_\_  
 \_\_\_\_\_  
 \_\_\_\_\_  
 \_\_\_\_\_  
 \_\_\_\_\_

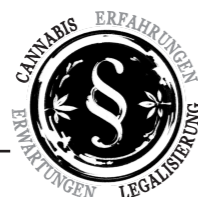

## 3. Eigene Erfahrungen mit Cannabiskonsum

### 3.1 Haben Sie jemals wissentlich Cannabis konsumiert?

 Ja

 Nein (weiter bei 4.1)

#### 3.1.1 Wie alt waren Sie, als Sie das letzte mal Cannabis konsumiert haben?

- 0 - 10 Jahre  21 - 30 Jahre  41 - 50 Jahre  61 - 70 Jahre  
 11 - 20 Jahre  31 - 40 Jahre  51 - 60 Jahre  71 - 80 Jahre

## 4. Erwartungen - Erwartete Folgen der Cannabislegalisierung

### 4.1 Wie schätzen Sie folgende Aussagen ein? Durch die Legalisierung von Cannabis

|                                                                                           | Stark abnehmen           | Keine Veränderung        | Stark zunehmen           |                          |
|-------------------------------------------------------------------------------------------|--------------------------|--------------------------|--------------------------|--------------------------|
| ... wird der Cannabiskonsum unter meinen Patienten ...                                    | <input type="checkbox"/> | <input type="checkbox"/> | <input type="checkbox"/> | <input type="checkbox"/> |
| ... wird die Zahl meiner Patienten mit behandlungsbedürftigen Cannabiskonsumstörungen ... | <input type="checkbox"/> | <input type="checkbox"/> | <input type="checkbox"/> | <input type="checkbox"/> |
| ... wird der Konsum meiner Patienten von anderen illegalen Drogen ...                     | <input type="checkbox"/> | <input type="checkbox"/> | <input type="checkbox"/> | <input type="checkbox"/> |
| ... werden meine Verordnungen für medizinisches Cannabis ...                              | <input type="checkbox"/> | <input type="checkbox"/> | <input type="checkbox"/> | <input type="checkbox"/> |
| ... wird die Zahl der Patienten, die mir Fragen über Cannabis stellt ...                  | <input type="checkbox"/> | <input type="checkbox"/> | <input type="checkbox"/> | <input type="checkbox"/> |

Nicht zutreffend

### 4.2 Wie schätzen Sie die Umsetzbarkeit der unten aufgeführten vier Ziele der deutschen Bundesregierung bezüglich der Cannabislegalisierung ein?

|                                                                                  | Überhaupt nicht umsetzbar | Sehr gut umsetzbar       |
|----------------------------------------------------------------------------------|---------------------------|--------------------------|
| 1) Die Qualität von Cannabis wird kontrolliert.                                  | <input type="checkbox"/>  | <input type="checkbox"/> |
| 2) Die Weitergabe verunreinigter Substanzen wird verhindert.                     | <input type="checkbox"/>  | <input type="checkbox"/> |
| 3) Jugend- und Gesundheitsschutz für Konsumenten wird bestmöglich gewährleistet. | <input type="checkbox"/>  | <input type="checkbox"/> |
| 4) Der Schwarzmarkt wird eingedämmt.                                             | <input type="checkbox"/>  | <input type="checkbox"/> |

### 4.3 Durch die Legalisierung von Cannabis

|                                                                 | Stimme gar nicht zu      | Stimme voll zu           |
|-----------------------------------------------------------------|--------------------------|--------------------------|
| ... werde ich mich zur kompetenten Cannabisberatung fortbilden. | <input type="checkbox"/> | <input type="checkbox"/> |

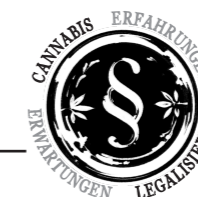

Supplement: MOESM1 [file 42238_2025_367_MOESM1_ESM.pdf]
