# Supplementary material for: Attitudes and expectations of primary care physicians regarding recreational cannabis legalization in Germany: a pre-implementation survey
Source: Springer Nature journal article supplement (doi:10.1186/s42238-025-00367-8), 2025-12-02
Supplement: MOESM2 [file 42238_2025_367_MOESM2_ESM.pdf]

## Experiences - Expectations of Cannabis Legalization

The federal government plans to legalize cannabis.

Little is known about the experiences of general practitioners and office-based anesthesiologists and their opinions on the expected consequences of cannabis legalization. This questionnaire aims to help close these knowledge gaps.

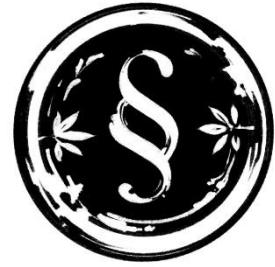

**Do you have patients who discuss cannabis with you?**

Yes  No

### 1. Experience with patients who consume cannabis (excluding medical cannabis)

**1.1 How often do you ask your patients about drug use (excluding alcohol and tobacco)?**

Not at all      Very frequently

**1.1.1 What is the most common occasion when you ask your patients about drugs (excluding alcohol and tobacco)?**

- during initial medical history
- during check-ups
- in case of suspicion/indications
- in each quarter
- based on gut feeling
- \_\_\_\_\_ (free text)

I never ask.  
(continue to 1.2)

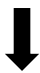

**1.1.2 Do you frequently ask your patients explicitly about illegal cannabis use?**

No, not at all      Yes, very frequently

**1.2 How many patients do you estimate you care for per year who illegally consume cannabis?**

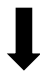

\_\_\_\_\_ (numerical value)  I don't know

**1.2.1 Do you discuss cannabis use with your patients who use cannabis?  
(F1x.2= substance dependence, F1x.1= harmful use)**

Yes  No

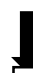

none  
(continue to 2.1)

## 2. Experience with prescribing medical cannabis

### 2.1 Do you prescribe medical cannabis in your practice?

Yes

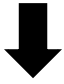

#### 2.1.1 Which symptoms are most commonly treated with medical cannabis in your practice?

(single choice)

Pain

Spasticity

Anorexia

\_\_\_\_\_ (free text)

*Only one  
answer please*

No (continue to 2.1.5)

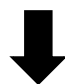

#### 2.1.5 Why don't you prescribe medical cannabis??

(Mehrfachauswahl möglich)

I'm not familiar with it.

I've never been asked for it.

I don't treat patients with relevant indications.

I don't believe in cannabis therapy.

The prescription process is too bureaucratic for me.

It's too time-consuming to thoroughly understand the therapy.

I'm concerned about reinforcing addiction disorders.

\_\_\_\_\_ (free text)

#### 2.1.2 How has the previously indicated symptom changed on average under treatment with medical cannabis?

                      

Significantly  
worsened

no change

Significantly  
improved

#### 2.1.3 How many of your patients receive medical cannabis per quarter approximately?

\_\_\_\_\_ (numerical value)

#### 2.1.4 How many of your patients who receive medical cannabis also consume illegal cannabis?

                            

None

Very many

I don't know

### 3. Personal experience with cannabis consumption

#### 3.1 Have you ever knowingly consumed cannabis?

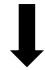

Yes

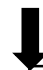

No

(continue to 4.1)

#### 3.1.1 How old were you when you last consumed cannabis?

- |                                       |                                       |
|---------------------------------------|---------------------------------------|
| <input type="checkbox"/> 0-10 years   | <input type="checkbox"/> 41- 50 years |
| <input type="checkbox"/> 11-20 years  | <input type="checkbox"/> 51- 60 years |
| <input type="checkbox"/> 21- 30 years | <input type="checkbox"/> 61- 70 years |
| <input type="checkbox"/> 31- 40 years | <input type="checkbox"/> 71- 80 years |

### 4. Expectations - Expected consequences of cannabis legalization

#### 4.1 How do you assess the following statements. Through the legalization of cannabis...

|                                                                                      | Strongly decrease        |                          | No change                |                          | Strongly increase        |                                         |
|--------------------------------------------------------------------------------------|--------------------------|--------------------------|--------------------------|--------------------------|--------------------------|-----------------------------------------|
| ...cannabis consumption among my patients will...                                    | <input type="checkbox"/> | <input type="checkbox"/> | <input type="checkbox"/> | <input type="checkbox"/> | <input type="checkbox"/> |                                         |
| ...the number of my patients with cannabis use disorders requiring treatment will... | <input type="checkbox"/> | <input type="checkbox"/> | <input type="checkbox"/> | <input type="checkbox"/> | <input type="checkbox"/> |                                         |
| ...my patients' consumption of other illegal drugs will...                           | <input type="checkbox"/> | <input type="checkbox"/> | <input type="checkbox"/> | <input type="checkbox"/> | <input type="checkbox"/> |                                         |
| ...my prescriptions for medical cannabis will...                                     | <input type="checkbox"/> | <input type="checkbox"/> | <input type="checkbox"/> | <input type="checkbox"/> | <input type="checkbox"/> | <input type="checkbox"/> not applicable |
| ...the number of patients who ask me questions about cannabis will...                | <input type="checkbox"/> | <input type="checkbox"/> | <input type="checkbox"/> | <input type="checkbox"/> | <input type="checkbox"/> |                                         |

#### 4.2 How do you assess the feasibility of the four goals of the German federal government regarding cannabis legalization listed below?

|                                                                                   | Not feasible at all      |                          |                          |                          |                          | Very feasible            |
|-----------------------------------------------------------------------------------|--------------------------|--------------------------|--------------------------|--------------------------|--------------------------|--------------------------|
| 1) The quality of cannabis will be controlled.                                    | <input type="checkbox"/> | <input type="checkbox"/> | <input type="checkbox"/> | <input type="checkbox"/> | <input type="checkbox"/> | <input type="checkbox"/> |
| 2) The distribution of contaminated substances will be prevented.                 | <input type="checkbox"/> | <input type="checkbox"/> | <input type="checkbox"/> | <input type="checkbox"/> | <input type="checkbox"/> | <input type="checkbox"/> |
| 3) Youth and health protection for consumers will be ensured as best as possible. | <input type="checkbox"/> | <input type="checkbox"/> | <input type="checkbox"/> | <input type="checkbox"/> | <input type="checkbox"/> | <input type="checkbox"/> |
| 4) The black market will be curtailed.                                            | <input type="checkbox"/> | <input type="checkbox"/> | <input type="checkbox"/> | <input type="checkbox"/> | <input type="checkbox"/> | <input type="checkbox"/> |

#### 4.3. Through the legalization of cannabis

| ...I will seek further training for competent cannabis counseling. | Strongly disagree        |                          |                          |                          |                          | Strongly agree |
|--------------------------------------------------------------------|--------------------------|--------------------------|--------------------------|--------------------------|--------------------------|----------------|
|                                                                    | <input type="checkbox"/> | <input type="checkbox"/> | <input type="checkbox"/> | <input type="checkbox"/> | <input type="checkbox"/> |                |

## 5. Sociodemographic data

### 5.1 Which gender do you identify with?

- male
- female
- diverse

### 5.2 Which medical specialty do you belong to? (Multiple selections possible)

- General practice
- Anesthesiology

\_\_\_\_\_ (free text)

#### 5.2.1 What additional qualifications do you have?

- Palliative Medicine
- Pain Medicine

\_\_\_\_\_ (free text)

- none

### 5.3 How old are you?

\_\_\_\_\_ (numerical value)

### 5.4 For how many years have you been working in the outpatient sector (including training period)?

\_\_\_\_\_ (numerical value)

### 5.5 How many hours per week do you work in the outpatient sector?

- Full-time
- > 20h
- ≤ 20h

### 5.6 How many patient insurance cards do you personally process on average per quarter in your practice?

- <100
- 100- 500
- 501- 1000
- > 1000

### 5.7 In welcher Praxisform arbeiten Sie? In what type of practice do you work?

- Solo practice
- Group practice\*
- Practice association\*\*
- Medical care center
- other

Thank you very much for your support and cooperation!

\* "Gemeinschaftspraxis" in German, i.e. doctors share patients, records, staff, equipment, and finances; they operate as a single legal and economic unit with shared liability.

\*\* "Praxisgemeinschaft" in German, i.e. doctors share physical space and possibly some resources (waiting room, equipment, administrative staff) for cost efficiency, but maintain separate practices with their own patients, medical records, billing, and legal identity.
